# Supplementary material for: Effect of gene mutation of plants on their mechano-sensibility: the mutant of EXO70H4 influences the buckling of Arabidopsis trichomes
Source: Royal Society of Chemistry journal article supplement (doi:10.1039/d1an00682g), 2021-01-01
Supplement: d1an00682g1.pdf [file d1an00682g1.pdf]

## Supporting Information

### **Effect of Gene Mutation of Plant on Their Mechano-Sensibility: Mutant of *EXO70H4* Influences the Buckling of *Arabidopsis* Trichomes**

Han Liu<sup>a,b,c</sup>, Shaobao Liu<sup>d</sup>, Guoyou Huang<sup>e</sup>, Feng Xu<sup>b,c\*</sup>

*<sup>a</sup> Collaborative Innovation Center for Chinese Medicine and Respiratory Diseases co-constructed by Henan province & Education Ministry of P.R. China, Academy of Chinese Medical Sciences, Henan University of Chinese Medicine, Zhengzhou 450016, China*

*<sup>b</sup> The Key Laboratory of Biomedical Information Engineering of Ministry of Education, School of Life Science and Technology, Xi'an Jiaotong University, Xi'an 710049, P.R. China*

*<sup>c</sup> Bioinspired Engineering and Biomechanics Center (BEBC), Xi'an Jiaotong University, Xi'an 710049, P.R. China*

*<sup>d</sup> State Key Laboratory of Mechanics and Control of Mechanical Structures, Nanjing University of Aeronautics and Astronautics, Nanjing 210016, China*

*<sup>e</sup> Department of Engineering Mechanics, School of Civil Engineering, Wuhan University, Wuhan 430072, P.R. China*

*\* Corresponding author: [fengxu@mail.xjtu.edu.cn](mailto:fengxu@mail.xjtu.edu.cn)*

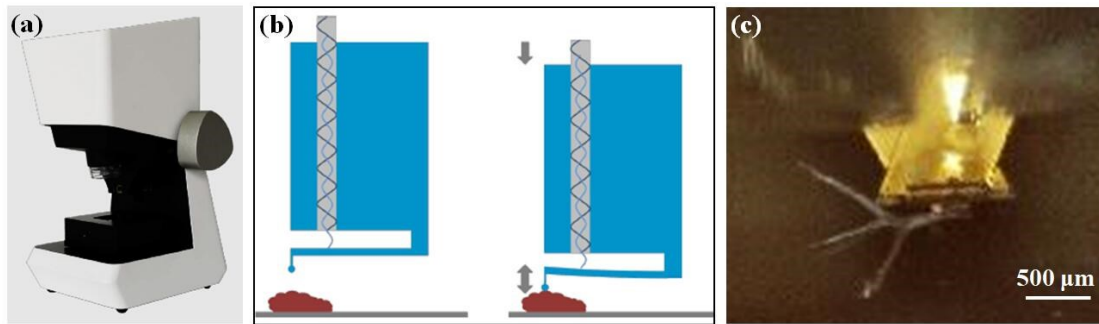

**Figure S1.** (a) Piuma Nanoindenter (OPTICS 11, De Boelelaan, 1081 HV Amsterdam, The Netherlands). (b) Schematic of the nanoindentation probe. (c) Optical microscope image of a trichome pressed by a nanoindenter.

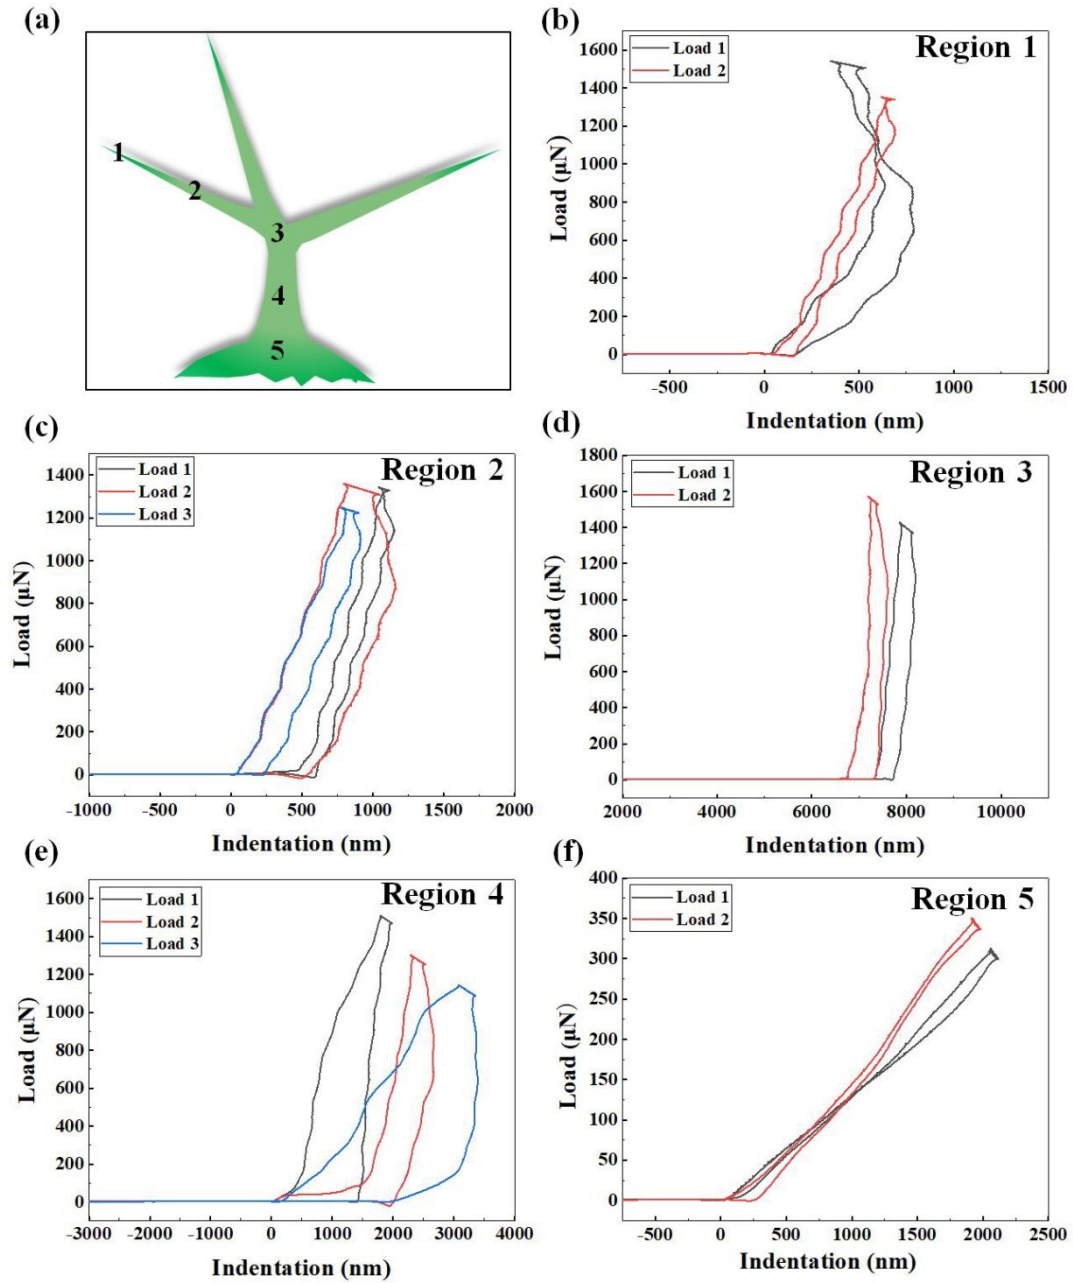

**Figure S2.** (a) The schematic of trichome in nanoindentation experiments, the numbers on the trichome means five different regions. (b-f) Curves of reaction force-indentation depth for five regions labeled in (a).

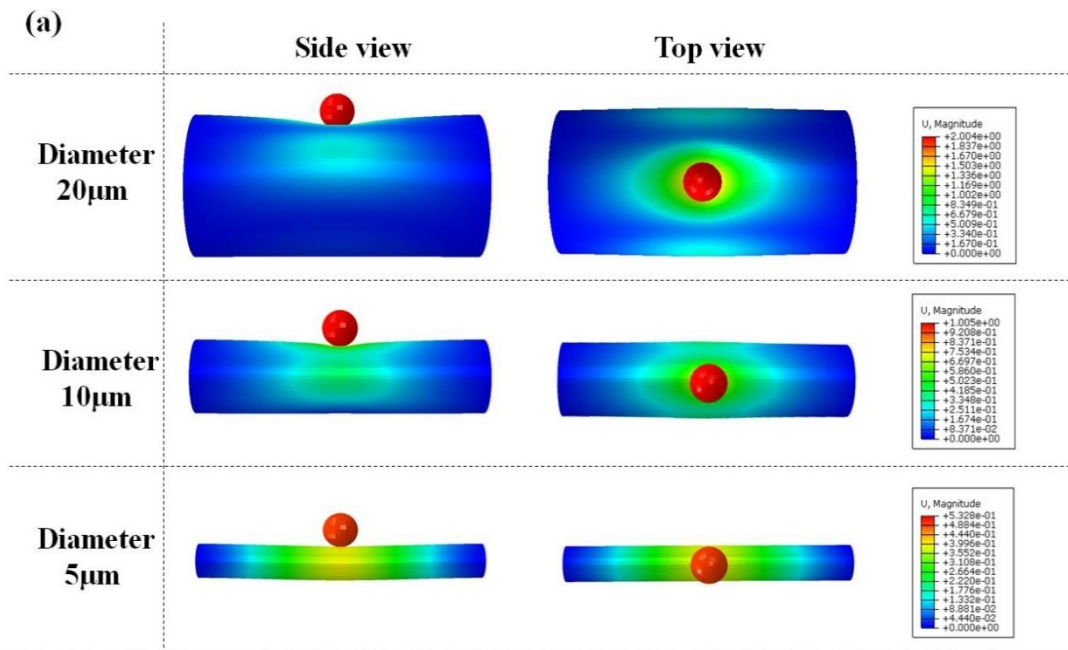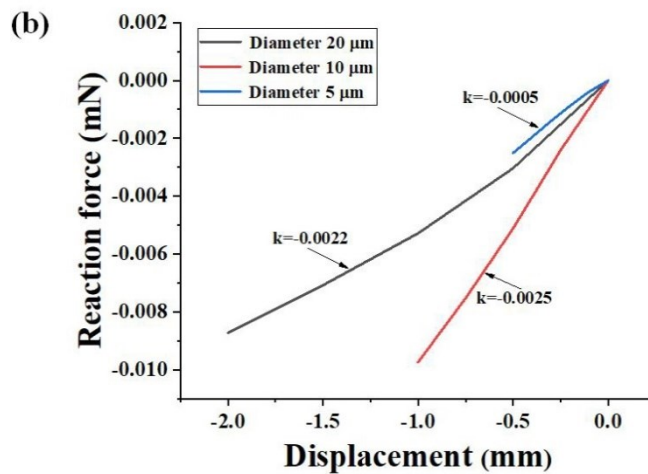

**Figure S3.** (a) Simulation of a spherical probe pressing on a hollow cylinder of trichome with different diameters, color images represented the contours of displacement magnitude. (b) Curves of reaction force-indentation depth,  $k$  is the slope of corresponding curve which indicated that Young's modulus measured by nanoindentation was not influenced by the hollow part of trichome branches.

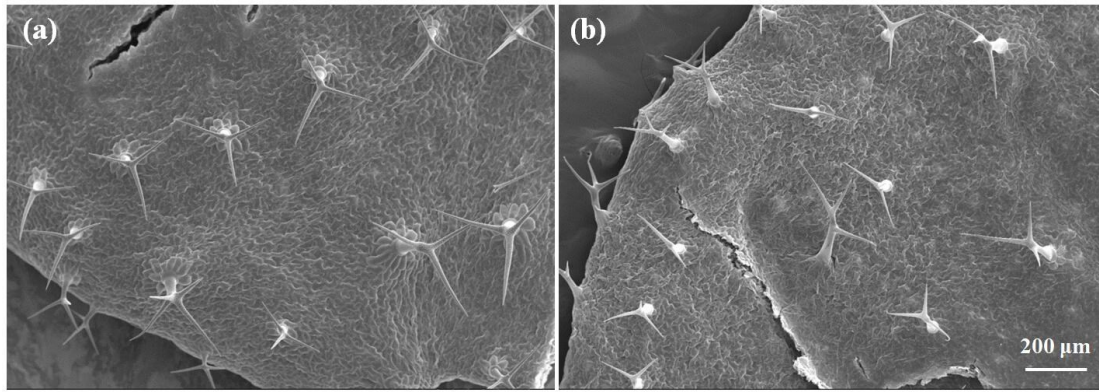

**Figure S4.** Scanning electron micrograph of the fourth leaves of a one-month-old wild type and mutant *Arabidopsis*, which suggested that no significant difference in the density and structure of trichomes between mutant *exo70H4* and the wild type.

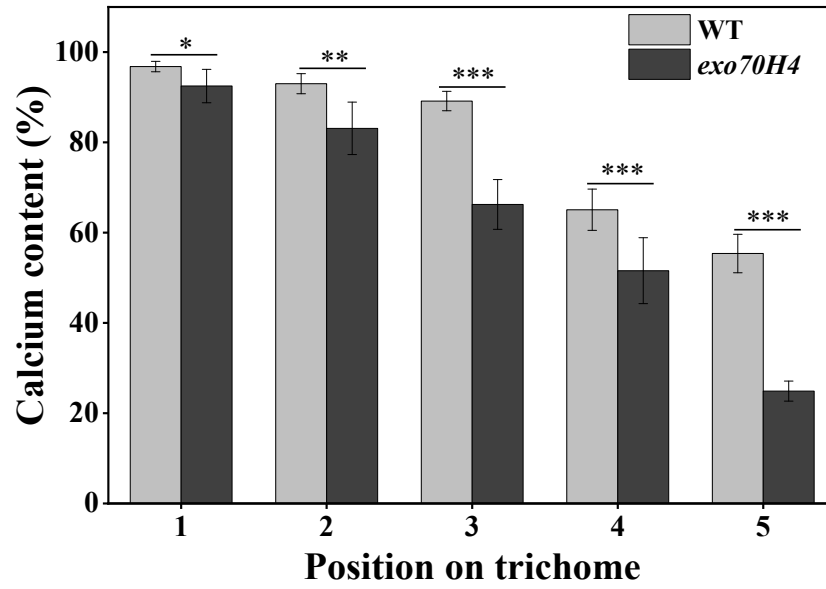

**Figure S5.** Absolute values of calcium content on mutant trichomes are significantly lower than the wild type at every region.

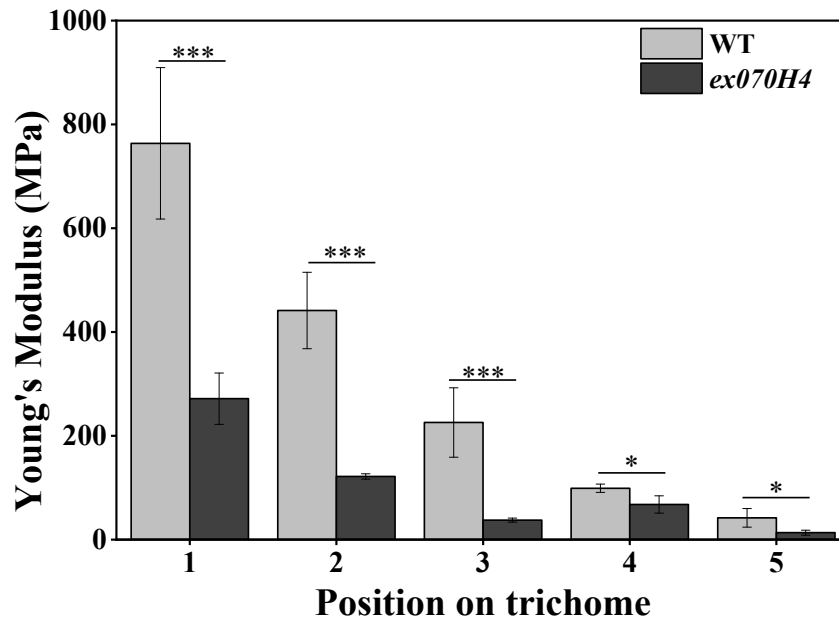

**Figure S6.** Absolute values of the Young's modulus of the mutant trichome are apparently lower than the wild type at every region.
